# Supplementary material
Source: publisher figshare collection journal article supplement (https://frontiersin.figshare.com/ndownloader/files/14357507)
Supplement: Supplementary file [file 14357507]

**Supplemental Table 1: *In vitro* studies on thyroid hormones and cancer**

| Cancer Type | Cell model                                             | Treatment/<br>concentration                                                                            | Thyroid hormone/inhibitor effect                                               | Proposed<br>mechanism               | Reference |
|-------------|--------------------------------------------------------|--------------------------------------------------------------------------------------------------------|--------------------------------------------------------------------------------|-------------------------------------|-----------|
| Breast      | MCF7,<br>T47D                                          | T3/10 <sup>-9</sup> -10 <sup>-7</sup> M                                                                | T3 increased proliferation                                                     | ER dependent                        | (12)      |
|             | T47D                                                   | T3/10M                                                                                                 | T3 increased proliferation                                                     | ER and T3R<br>mediated              | (13)      |
|             | MCF7                                                   | T3/10 <sup>-11</sup> -10 <sup>-8</sup> M                                                               | T3 increased proliferation                                                     | Thyroid<br>receptor<br>mediated     | (10)      |
|             | MCF7<br>(ER+)                                          | T3/10 <sup>-10</sup> -10 <sup>-8</sup> M                                                               | T3 increased proliferation                                                     | ER dependent                        | (14)      |
|             | MCF7                                                   | T4/10 <sup>-7</sup> M                                                                                  | T4 increased proliferation                                                     | Membrane<br>receptor                | (11)      |
|             | T47D                                                   | T3/10 <sup>-9</sup> M                                                                                  | T3 promoted cell migration                                                     | Integrin $\alpha\text{v}\beta 3$    | (17)      |
|             | MDA-<br>MB-231                                         | T4/10 <sup>-7</sup> M                                                                                  | T4 stimulated PDL1 expression                                                  | Integrin<br>$\alpha\text{v}\beta 3$ | (18)      |
|             | MDA-<br>MB-231                                         | Nanotetrac/<br>2X10 <sup>-7</sup> M                                                                    | Nanotetrac sensitized to apoptosis<br>and increased angiogenesis<br>inhibitors | Integrin $\alpha\text{v}\beta 3$    | (19)      |
|             | MCF7                                                   | T3/10 <sup>-6</sup> M                                                                                  | T3 enhanced apoptosis                                                          | SMP30<br>downregulation             | (206)     |
|             | MCF7                                                   | T3/7.7x10 <sup>-6</sup> -<br>3.1x10 <sup>-5</sup> M<br>T4/5X10 <sup>-6</sup> -<br>2X10 <sup>-5</sup> M | T3 and T4 decreased proliferation                                              | c-fos<br>upregulation               | (207)     |
|             | S30<br>(MDA-<br>MB-231<br>ER $\alpha$ +) )             | T3/10 <sup>-8</sup> M                                                                                  | T3 inhibited proliferation                                                     | ER expression                       | (208)     |
|             | Hs 578T,<br>MDA-<br>MB-231,<br>MDA-<br>MB-468,<br>T47D | T3/7.7x10 <sup>-6</sup> -<br>3.1x10 <sup>-5</sup> M<br>T4/5X10 <sup>-6</sup> -<br>2X10 <sup>-5</sup> M | T3 and T4 inhibited proliferation                                              | Undetermined                        | (209)     |
|             | MCF7<br>MDA-<br>MB-231                                 | T3/2-32 ng/ml                                                                                          | T3 enhanced chemosensitization<br>to 5FU and taxol                             | Undetermined                        | (119)     |

|          |                      |                                                                                                |                                                                       |                                           |       |
|----------|----------------------|------------------------------------------------------------------------------------------------|-----------------------------------------------------------------------|-------------------------------------------|-------|
|          | MDA-MB-231           | T3/10 <sup>-8</sup> M                                                                          | T3 enhanced doxorubicin-induced cell death                            | Sensitization of mitochondrial metabolism | (16)  |
| Prostate | PC3, DU145, LNCaP    | T3/7.7x10 <sup>-6</sup> -3.1x10 <sup>-5</sup> M<br>T4/5x10 <sup>-6</sup> -2x10 <sup>-5</sup> M | T3 and T3 inhibited proliferation                                     | c-fos upregulation                        | (207) |
|          | LNCaP                | T3/10 <sup>-10</sup> -10 <sup>-6</sup> M                                                       | T3 increased proliferation                                            | Downregulation of BTG2                    | (20)  |
|          | LNCaP                | T4/10 <sup>-7</sup> M                                                                          | T4 induced invasion and VEGF                                          |                                           | (21)  |
|          | LNCaP, PC3, DU145    |                                                                                                | T4 promoted migration and depressed detachment-induced apoptosis      | Integrin $\alpha v \beta 3$               | (22)  |
| Lung     | H522                 | T4/10 <sup>-7</sup> M                                                                          | T4 induced HIF-1 $\alpha$                                             | Integrin $\alpha v \beta 3$               | (25)  |
|          | NCI-H522, NCI-H510A  | T3/10 <sup>-9</sup> -10 <sup>-6</sup> M<br>T4/10 <sup>-8</sup> -10 <sup>-6</sup> M             | T4 and T3 increased proliferation                                     | Integrin $\alpha v \beta 3$               | (23)  |
|          | H1299                | T3/10 <sup>-9</sup> -10 <sup>-6</sup> M<br>T4/10 <sup>-8</sup> -10 <sup>-6</sup> M             | T4 and T3 increased proliferation                                     | Integrin $\alpha v \beta 3$               | (24)  |
| Ovary    | OVCAR3               | T3/7.7x10 <sup>-6</sup> -3.1x10 <sup>-5</sup> M<br>T4/5x10 <sup>-6</sup> -2x10 <sup>-5</sup> M | T3 and T4 inhibited proliferation                                     | Undetermined                              | (209) |
|          | SKOV3, OVCAR3        | T3, T4/10 <sup>-5</sup> -10 <sup>-9</sup> M                                                    | T3 and T4 Induced proliferation in SOKV3 and inhibited in OVCAR3      | Akt pathway                               | (73)  |
|          | OVCAR3, A2780, SKOV3 | T3/10 <sup>-9</sup> M<br>T4/10 <sup>-7</sup> M                                                 | T3 and T4 increased proliferation                                     | Integrin $\alpha v \beta 3$               | (26)  |
|          | OVCAR3, SKOV3        | T4/10 <sup>-7</sup> M                                                                          | T4 increased proliferation                                            | Integrin $\alpha v \beta 3$               | (27)  |
|          | OVCAR3               | T4/10 <sup>-7</sup> M                                                                          | T4 induced HIF-1 $\alpha$                                             | Integrin $\alpha v \beta 3$               | (25)  |
|          | OVCAR3, SKOV3, A2780 | T3/10 <sup>-9</sup> M<br>T4/10 <sup>-7</sup> M                                                 | T4 and T3 was involved in EMT                                         | Integrin $\alpha v \beta 3$               | (28)  |
|          | OVCAR3, A2780        | T3/10 <sup>-9</sup> M<br>T4/10 <sup>-7</sup> M                                                 | T3 and T4 induced MAPK and PI3K mediated gene expression              | Integrin $\alpha v \beta 3$               | (213) |
|          | OVCAR3, A2780        | Tetrac, Triac, T1AM/<br>1-25x10 <sup>-6</sup> M                                                | Tetrac, Ttriac and T1AM inhibited proliferation and induced apoptosis | Integrin $\alpha v \beta 3$               | (29)  |

|               |                          |                                        |                                                                                              |                             |       |
|---------------|--------------------------|----------------------------------------|----------------------------------------------------------------------------------------------|-----------------------------|-------|
| Cervix        | HeLa                     | $T4/10^{-7}M$                          | T4 induced MAPK activation                                                                   | Membrane receptor           | (32)  |
|               | HeLa                     | $T4/2.3 \times 10^{-11}M$              | T4 induced MAPK activation                                                                   | Membrane receptor           | (30)  |
|               | HeLa                     | $T4/10^{-7}M$                          | T4 induced MAPK activation                                                                   | Membrane receptor           | (31)  |
| Glioblastoma  | U87                      | $T3, T4/10^{-10}-10^{-6}M$             | T3 and T4 increased proliferation                                                            | Integrin $\alpha v \beta 3$ | (9)   |
|               | C6, F98, GL261           | $T3/10^{-8}-10^{-6}M$<br>$T4/10^{-7}M$ | T4 and T3 increased proliferation                                                            | Integrin $\alpha v \beta 3$ | (33)  |
|               | C6, GL261, U87MG         | free T4/<br>$0.7 \times 10^{-10}M$     | T4 inhibited resveratrol induced apoptosis                                                   | Integrin $\alpha v \beta 3$ | (34)  |
|               | U87MG                    | $T3/10^{-9}M$                          | T3 inhibited proliferation and promoted re-differentiation                                   | Akt pathway                 | (35)  |
| Astrocytoma   | 1321N1                   | $T3/10^{-9}M$                          | T3 increased proliferation and promoted re-differentiation                                   | Akt pathway                 | (35)  |
| Neuroblastoma | Neuroblastoma cells      | $T3/5 \times 10^{-9}M$                 | T3 inhibited ras-induced proliferation                                                       | Thyroid receptor mediated   | (36)  |
| Renal         | Caki-2, Caki-1           | $T3/10^{-7}M$                          | T3 increased proliferation                                                                   | Thyroid receptor mediated   | (42)  |
| Gastric       | MKN28                    | $T3/2 \times 10^{-9}M$                 | T3 induced expression of VEGF and HIF1 $\alpha$                                              | Akt pathway                 | (45)  |
| Pancreas      | hCM, hPANC1              | $T3, T4/10^{-5}-10^{-9}M$              | T3 and T4 increased proliferation in hCM and inhibited proliferation in hPANC1               | Akt pathway                 | (73)  |
|               | MiaPaCa-2, AsPC-1        | $T3/10^{-9}-5 \times 10^{-6}M$         | T3 increased proliferation, migration, and invasion                                          | Undetermined                | (51)  |
|               | hPANC1, Capan1,          | $T3/10^{-5}-10^{-9}M$                  | T3 inhibited proliferation and potentiated the cytotoxic effect of gemcitabine and cisplatin | Cyclin–CDK inhibition       | (50)  |
| Colon         | HT-29, HCT116            | $T4/10^{-7}M$                          | T4 stimulated PDL1 expression                                                                | Integrin $\alpha v \beta 3$ | (18)  |
|               | HT29-D4                  | $T3/1.5 \times 10^{-9}M$               | T3 promotes limited cell growth and differentiation                                          | Undetermined                | (214) |
|               | HT-29, COLO 205, HCT 116 | $T4/10^{-8}-10^{-6}M$                  | T4 increased proliferation                                                                   | Integrin $\alpha v \beta 3$ | (46)  |

|                      |                                               |                                                                            |                                                                |                             |      |
|----------------------|-----------------------------------------------|----------------------------------------------------------------------------|----------------------------------------------------------------|-----------------------------|------|
|                      | LS180,<br>Caco-2                              | $T4/10^{-7}$ - $10^{-4}$ M<br>$T3/2 \times 10^{-9}$ - $2 \times 10^{-6}$ M | T4 and T3 up regulated MDR-1 protein                           | Undetermined                | (48) |
|                      | CaCo-2                                        | $T3/3 \times 10^{-9}$ M                                                    | T3 Inhibited proliferation and increased differentiation       | E cadherin induction        | (47) |
|                      | HT-29,<br>HCT116                              | $T4/10^{-7}$ M                                                             | T4 stimulated PDL1 expression                                  | Integrin $\alpha v \beta 3$ | (18) |
| Hepatocellular       | J7-TR $\alpha$ 1                              | $T3/10^{-8}$ M                                                             | T3 increased migration and invasion                            | Thyroid receptor mediated   | (60) |
|                      | HepG2,<br>Huh7,<br>Mahlavu,<br>J7             | $T3/10^{-8}$ M                                                             | T3 increased migration and invasion                            | Thyroid receptor mediated   | (59) |
|                      | HepG2                                         | $T3/10^{-6}$ M                                                             | T3 induced ERK1/2 and Akt phosphorylation                      | Integrin $\alpha v \beta 3$ | (62) |
|                      | CSQT-2                                        | $T4/10^{-5}$ M                                                             | TH promoted HCC cells self-renewal                             | Thyroid receptor mediated   | (61) |
|                      | HepG2-TR                                      | $T3/10^{-8}$ - $10^{-7}$ M                                                 | T3 inhibited cell proliferation                                | Thyroid receptor mediated   | (52) |
|                      | HepG2-TR $\alpha$ 1,<br>SK-Hep1-TR $\alpha$ 1 | $T3/10^{-8}$ M                                                             | T3 reduced cell proliferation mediated by endoglin             | Thyroid receptor mediated   | (53) |
|                      | HepG2-TR $\alpha$ 1                           | $T3/10^{-8}$ M                                                             | T3 inhibited cell proliferation                                | Thyroid receptor mediated   | (55) |
|                      | HepG2                                         | $T3/10$ nM                                                                 | T3 upregulated DKK4 which suppressed invasion                  | Thyroid receptor mediated   | (54) |
| Adrenocortical       | SW13,<br>H295R                                | $T3, T4/10^{-9}$ - $10^{-5}$ M                                             | T3 and T4 Induced proliferation in SW13 and inhibited in H295R | Undetermined                | (73) |
| Thyroid              | BHP2-7,<br>BHP18-21,<br>FTC236                | $T3/10^{-10}$ - $10^{-7}$ M<br>$T4/10^{-8}$ - $10^{-7}$ M                  | T3 and T4 increased proliferation                              | Integrin $\alpha v \beta 3$ | (71) |
| Basal cell Carcinoma | G2N2C                                         | $T3/3 \times 10^{-9}$ M                                                    | T3 reduced growth rate and induced apoptosis                   | Protein kinase A induction  | (72) |

|                  |                                                           |                                                            |                                                      |                             |       |
|------------------|-----------------------------------------------------------|------------------------------------------------------------|------------------------------------------------------|-----------------------------|-------|
| Multiple Myeloma | RPMI 8226, CAG, primary BM cultures                       | T3/ $10^{-9}$ M<br>T4/ $10^{-7}$ M                         | T3 and T4 induced proliferation and viability        | Integrin $\alpha v \beta 3$ | (64)  |
|                  | RPMI 8226, U266, ARP-1, ARK, CAG                          | T4/ $10^{-7}$ - $10^{-6}$ M                                | T3 and T4 induced proliferation and viability        | Integrin $\alpha v \beta 3$ | (63)  |
|                  | CAG, RPMI-8226, U266, primary BM cultures                 | T3/ $10^{-9}$ M<br>T4/ $10^{-7}$ M                         | T3 and T4 increased cell migration and invasion      | Integrin $\alpha v \beta 3$ | (65)  |
|                  | CAG, ARK, RPMI-8226, U266, ARP-1, primary BM cultures     | Tetrac/<br>$10^{-6}$ - $5 \times 10^{-5}$ M                | Tetrac inhibited proliferation and induced apoptosis | Integrin $\alpha v \beta 3$ | (66)  |
| Leukemia         | LBC cells                                                 | T3/ $10^{-9}$ - $10^{-4}$ M<br>T4/ $10^{-9}$ - $10^{-4}$ M | No direct effect of thyroid hormones                 |                             | (101) |
| Lymphoma         | MJ, HuT78, OCI-Ly12, OCI-Ly13.2, Mac2a, Karpas299, SUDHL1 | T3/ $10^{-9}$ M<br>T4/ $10^{-7}$ M                         | T3 and T4 induced proliferation and VEGF expression  | Integrin $\alpha v \beta 3$ | (69)  |

|              |                                |                                    |                                             |                             |       |
|--------------|--------------------------------|------------------------------------|---------------------------------------------|-----------------------------|-------|
| Angiogenesis | CAM model                      | T4/ $10^{-7}$ M                    | T4 induced angiogenesis                     | Integrin $\alpha v \beta 3$ | (199) |
|              |                                | T4/ $10^{-7}$ M<br>T3/ $10^{-9}$ M | T3 and T4 induced angiogenesis              | Membrane receptor           | (216) |
|              |                                | T3,T4/<br>$10^{-7}$ - $10^{-9}$ M  | T4 and T3 induced angiogenesis              | Integrin $\alpha v \beta 3$ | (201) |
|              |                                | T4/ $10^{-7}$ M                    | T4 induced angiogenesis                     | Integrin $\alpha v \beta 3$ | (200) |
|              | CAM (lung cancer)              | Tetrac<br>1 $\mu$ gr/CAM           | Tetrac inhibited tumor related angiogenesis | Integrin $\alpha v \beta 3$ | (24)  |
|              | CAM (renal cell cancer)        | Tetrac<br>1 $\mu$ gr/CAM           | Tetrac inhibited tumor related angiogenesis | Integrin $\alpha v \beta 3$ | (202) |
|              | CAM (Medullary thyroid cancer) | Tetrac<br>1 $\mu$ gr/CAM           | Tetrac inhibited tumor related angiogenesis | Integrin $\alpha v \beta 3$ | (92)  |
|              | CAM (follicular cancer)        | Tetrac<br>1 $\mu$ gr/CAM           | Tetrac inhibited tumor related angiogenesis | Integrin $\alpha v \beta 3$ | (203) |

**Supplemental Table 2: *In vivo* studies on thyroid hormones and cancer**

| Cancer type | Animal model                     | Cancer model               | Thyroid hormone/inhibitor effect                                                                       | References |
|-------------|----------------------------------|----------------------------|--------------------------------------------------------------------------------------------------------|------------|
| Breast      | C3H/HeN mice                     | Mammary tumor virus        | T3 increased tumor incidence                                                                           | (210)      |
|             | Sprague-dawley rats              | MNU induced breast cancer  | Hyperthyroidism increased tumor incidence. Hypothyroidism decreased tumor incidence                    | (211)      |
|             | C3H/HeN mice                     | Mammary tumor virus        | Hypothyroidism decreased tumor incidence                                                               | (77)       |
|             | Sprague-dawley rats              | DMBA induced breast cancer | Hypothyroidism decreased tumor incidence                                                               | (80)       |
|             | Sprague-dawley rats              | DMBA induced breast cancer | Hypothyroidism decreased tumor incidence, increased latency and slowed tumor growth                    | (82)       |
|             | C3H/he mice                      | C3HBA cells                | hypothyroidism slowed tumor growth and increased survival                                              | (83)       |
|             | Sprague dawley rats              | MNU induced breast cancer  | Hypothyroidism decreased tumor incidence and tumor volume                                              | (81)       |
|             | CH3/He mice                      | C3HBA cells                | Hypothyroidism led to tumor remission                                                                  | (84)       |
|             | C3H-A mice                       | De novo                    | Hyperthyroidism increased tumor incidence and aggressiveness. Hypothyroidism decreased tumor incidence | (212)      |
|             | Nu/Nu mice                       | MDA-MB-468                 | Hypothyroidism retarded tumor growth and enhanced invasiveness and metastases                          | (85)       |
| Prostate    | Nu/Nu mice                       | PC3 cells                  | Hypothyroidism reduced growth rate                                                                     | (87)       |
|             | Ncr-nude mice<br>mnNCr-nude mice | PC3 cells                  | Hypothyroidism reduced growth rate                                                                     | (88)       |

|                |                       |                                         |                                                                                            |       |
|----------------|-----------------------|-----------------------------------------|--------------------------------------------------------------------------------------------|-------|
|                | BALB/c mice           | LNCaP, DU145 cells                      | T3 reduced tumor growth                                                                    | (21)  |
| Lung           | C57BL/6N mice         | 3LL cells                               | T4 increased tumor growth and metastases                                                   | (89)  |
|                | CB4-C57 Mice          | 3LL cells                               | T4 increased tumor growth and angiogenesis                                                 | (90)  |
|                | NCr nude mice         | NCI-H1299 cells                         | Tetrac suppressed tumor growth                                                             | (24)  |
|                | mnNCr-nude mice       | 201T cells                              | Hypothyroidism slowed tumor growth                                                         | (88)  |
| Glioblastoma   | Nude NCr mice         | U87MG-luc cells                         | Nanotetrac reduced tumor size and decreased vascularity                                    | (93)  |
| Renal          | NCr nude mice         | CR1932-786-0 cells                      | Tetrac reduced tumor size                                                                  | (202) |
| Gastric        | Wistar rats           | MNNG induced breast cancer              | Hyperthyroidism increased cancer incidence                                                 | (94)  |
| Pancreas       | NCr mice              | PANC-1, MPanc96 cells                   | Tetrac inhibited tumor growth and angiogenesis                                             | (91)  |
| Colon          | Wistar rats           | Azoxymethane (AOM) induced colon cancer | T4 increased cancer incidence                                                              | (95)  |
| Hepatocellular | Buffalo rats          | Morris Hepatoma 44 cells                | Hypothyroidism reduced tumor growth, number and size of metastases and prolonged survival. | (96)  |
|                | Fisher rats           | DENA/2-AAF induced hepatocarcinoma      | Hyperthyroidism associated with preneoplastic nodule regression                            | (56)  |
|                | Scid mice             | J7-TR cells                             | T3 increased invasion and lung metastases                                                  | (60)  |
|                | Nu/Nu mice            | SK-hep1                                 | Hypothyroidism retarded tumor growth and enhanced invasiveness and metastases              | (85)  |
| Thyroid        | NCr nude mice         | h-MTC cells                             | Tetrac inhibited tumor growth                                                              | (92)  |
|                | Thrb <sup>PV/PV</sup> | De novo                                 | Hypothyroidism inhibited tumor growth                                                      | (108) |
|                | NCr nude mice         | FTC-236                                 | Tetrac inhibited tumor growth                                                              | (203) |
| Melanoma       | C57BL/6 mice          | B16F10 cells                            | Hypothyroidism increased tumor latency and survival                                        | (103) |



|                         |                             |                     |                                                            |       |
|-------------------------|-----------------------------|---------------------|------------------------------------------------------------|-------|
| Basal cell carcinoma    | K5-Gli2                     | De novo tumors      | T3 reduced tumor growth                                    | (72)  |
| Ehrlich tumor carcinoma | Swiss mice                  | Ehlich tumor cells  | Hyperthyroidism increased tumor size                       | (78)  |
|                         | Swiss strain mice           | Ehrlich tumor cells | Hypothyroidism resulted in lower ascitic volume            | (215) |
| Sarcoma                 | A/Jax mice<br>C57BL/6J mice | S-1, t241 cells     | Thyroxine tumor size and metastases.                       | (106) |
| Lymphoma                | C57BL/6J mice               | EL4 cells           | Hyperthyroidism increased tumor growth                     | (70)  |
|                         | C57BL/6J mice               | EL4 cells           | Hypothyroidism increased tumor growth and reduced survival | (102) |

**Supplemental table 3: Clinical studies on thyroid hormones and cancer**

| Cancer type | Research design  | Number of cases                                 | Thyroid function/treatment         | Clinical outcome                                                                            | Reference |
|-------------|------------------|-------------------------------------------------|------------------------------------|---------------------------------------------------------------------------------------------|-----------|
| Breast      | Case control     | 682 pts<br>731 controls                         | Full thyroid spectrum              | Higher total T4 and lower total T3 associated with increased risk                           | (118)     |
|             | Population based | 75,056                                          | hyperthyroidism                    | Elevated risk and mortality after 60 years                                                  | (142)     |
|             | Meta analysis    | 24,808<br>(13 studies)                          | Hypothyroidism/<br>Hyperthyroidism | Thyroid dysfunction may not be related to cancer risk                                       | (122)     |
|             | Population based | 61,873<br>hypothyroid<br>80,373<br>hyperthyroid | Hypothyroidism/<br>Hyperthyroidism | Hyperthyroidism associated with increased and hypothyroidism associated with decreased risk | (115)     |
|             | Series/cohort    | 437                                             | Full thyroid spectrum              | Higher TSH associated with decreased risk of triple positive breast cancer                  | (116)     |
|             | Case control     | 676 pts<br>680 controls                         | Hyperthyroidism                    | High free T4 associated with higher risk                                                    | (113)     |
|             | Case control     | 120                                             | Full thyroid spectrum              | Higher total T4 and total T3 in cancer patients                                             | (230)     |
|             | Clinical trial   | 28                                              | hypothyroidism                     | Longer progression free survival                                                            | (150)     |
|             | Population based | 2,185                                           | Hyperthyroidism                    | Higher T3 associated with higher risk of cancer, large tumors and lymph node metastases     | (114)     |
|             | Case control     | 2,663 pts<br>2,344 controls                     | Thyroid disorders                  | Thyroid disease unrelated to cancer risk                                                    | (223)     |

|  |                  |                                                 |                                    |                                                                                     |       |
|--|------------------|-------------------------------------------------|------------------------------------|-------------------------------------------------------------------------------------|-------|
|  | Case control     | 4,575 pts<br>4,682 controls                     | Thyroid disorders                  | Thyroid disorders unrelated to cancer risk                                          | (220) |
|  | Case control     | 1,362 patients<br>1,250 controls                | Hypothyroidism                     | Reduced cancer risk                                                                 | (221) |
|  | case control     | 369 pts<br>316 controls                         | range                              | Lower total T3 and higher total T4 in cancer patients                               | (119) |
|  | Case control     | 676 pts<br>680 controls                         | Hyperthyroidism                    | Increased cancer risk                                                               | (112) |
|  | Population based | 2,186                                           | Hyperthyroidism                    | T3 associated with breast cancer death                                              | (149) |
|  | Meta analysis    | 18,428 cases<br>22,378 controls<br>(26 studies) | Hypothyroidism/<br>Hyperthyroidism | No significant association with breast cancer risk                                  | (121) |
|  | Meta-analysis    | 206,918<br>(12 studies)                         | Hypothyroidism                     | No association with breast cancer risk                                              | (224) |
|  | Population based | 2,696                                           | Hyperthyroidism                    | T3 associated with cancer risk                                                      | (219) |
|  | Case control     | 65 pts<br>38 controls                           | Full thyroid spectrum              | Free T3 and free T4 higher in cancer patients                                       | (217) |
|  | Series/cohort    | 1,665                                           | Hypothyroidism                     | No increased risk in hypothyroid women using thyroid supplements                    | (226) |
|  | Series/cohort    | 5,505                                           | Undetermined                       | Higher incidence of cancer in patients receiving thyroid supplements                | (188) |
|  | Series/cohort    | 2,775                                           | Hypothyroidism                     | Cancer related to earlier hypothyroidism, low free T4 and use of thyroid medication | (189) |

|          |                         |                                                                 |                                  |                                                                                               |       |
|----------|-------------------------|-----------------------------------------------------------------|----------------------------------|-----------------------------------------------------------------------------------------------|-------|
|          | Case control            | 21 cancer and hyperthyroidism<br>100 cancer without thyroid dis | hyperthyroidism                  | Higher mortality in hyperthyroid patients                                                     | (148) |
|          | Population based cohort | 89,793 LT4 users<br>89,793 controls                             | LT4 treatment                    | Lower mortality followin BC diagnosis in LT4 users.                                           | (225) |
|          | Case control            | 1,136 pts<br>1,088 controls                                     | hypothyroidism                   | Lower risk of BC, older age at diagnosis, more localized disease, less lymph node involvement | (137) |
|          | Population based        | 10,318                                                          | Hyperthyroidism                  | Higher free T4 associated with higher risk                                                    | (111) |
|          | Case control            | 26 pts<br>22 controls                                           | Subclinical hyperthyroidism      | Higher subclinical hyperthyroidism in postmenopausal cancer patients                          | (218) |
| Prostate | Series/cohort           | 68                                                              | Hyperthyroidism                  | T3 associated with risk of recurrence                                                         | (227) |
|          | Case control            | 402 pts<br>800 controls                                         | hypothyroidism                   | Decreased risk                                                                                | (124) |
|          | Case control            | 161 pts<br>27 controls                                          | Full thyroid spectrum            | Higher T3 in patients                                                                         | (228) |
|          | Series/cohort           | 3,649                                                           | Hyperthyroidism / Hypothyroidism | Higher TSH associated with lower risk. Higher free T4 associated with increased risk          | (123) |
|          | Population based        | 29,691                                                          | Hyperthyroidism                  | Increased cancer risk                                                                         | (109) |
| Lung     | Series/cohort           | 51                                                              | Hypothyroidism                   | Longer survival                                                                               | (152) |

|         |                               |                                                           |                                 |                                                                                                 |       |
|---------|-------------------------------|-----------------------------------------------------------|---------------------------------|-------------------------------------------------------------------------------------------------|-------|
|         | Case control                  | 85 pts<br>85 controls                                     | Hypothyroidism                  | Longer survival and later diagnosis                                                             | (151) |
|         | Population based              | 13.93 million<br>LT4 boxes                                | LT4 treatment                   | LT4 use associated with cancer                                                                  | (190) |
|         | Series/cohort                 | 7338 women                                                | Hyperthyroidism                 | Increased mortality                                                                             | (231) |
|         | Population based              | 10,318                                                    | Hyperthyroidism                 | Higher free T4 associated with higher risk                                                      | (111) |
|         | Population based              | 29,691                                                    | Hyperthyroidism                 | Increased risk                                                                                  | (109) |
|         | Case control                  | 9 pts<br>11 controls                                      | Full thyroid spectrum           | TSH lower and free T4 higher in cancer pts                                                      | (229) |
| Ovarian | cohort                        | 238,130                                                   | Hypothyroidism                  | Inverse association with cancer (nonsignificant)                                                | (126) |
|         | Case control                  | 120                                                       | Full thyroid spectrum           | Higher T4 in cancer patients                                                                    | (230) |
|         | Case control                  | 767 pts<br>1,367 controls                                 | hyperthyroidism                 | Increased risk                                                                                  | (125) |
|         | Population based case-control | 160 hyperthyroidism<br>624 hypothyroidism<br>5038 control | Hyper/hypothyroidism            | Hyperthyroidism associated with increased mortality. Modest association with hypothyroidism.    | (153) |
| Uterine | Series/cohort                 | 238,130                                                   | Hypothyroidism /hyperthyroidism | Hyperthyroidism positively and hypothyroidism inversely associated with cancer (nonsignificant) | (126) |
|         | observational                 | 199 patients with EC                                      | Hypothyroidism                  | Decreased survival                                                                              | (232) |

|                        |                             |                         |                            |                                                                      |       |
|------------------------|-----------------------------|-------------------------|----------------------------|----------------------------------------------------------------------|-------|
|                        | Population based            | 99,812                  | Thyroid disease            | Uterine cancers related to previous thyroid disease                  | (127) |
| Central nervous system | Case control                | 18 cases<br>32 controls | T3 treatment               | Longer survival in T3 treated glioblastoma patients                  | (195) |
|                        | Interventional case control | 11 cases<br>11 controls | PTU induced hypothyroidism | Longer survival in hypothyroid group                                 | (196) |
|                        | Case report                 | 1                       | Induced hypothyroidism     | Prolonged survival                                                   | (193) |
| Renal                  | Meta analysis               | 147 (4 studies)         | Hypothyroidism             | Improved survival in hypothyroid patients with sunitinib therapy     | (163) |
|                        | Series/cohort               | 65                      | Hypothyroidism             | Improved survival                                                    | (157) |
|                        | Prospective observational   | 111 (sunitinib tx.)     | hypothyroidism             | No difference in PFS after 6m                                        | (162) |
|                        | Series/cohort               | 31 (sunitinib tx.)      | Hypothyroidism             | Longer survival (nonsignificant)                                     | (234) |
|                        | Series/cohort               | 41 (sunitinib tx.)      | Hypothyroidism             | Prolonged PFS in hypothyroid patients receiving thyroid substitution | (158) |
|                        | Series/cohort               | 83 (TKI tx.)            | Hypothyroidism             | Prolonged PFS                                                        | (160) |
|                        | Series/cohort               | 16                      | hypothyroidism             | Favourable response to treatment                                     | (154) |
|                        | Series/cohort               | 87 (TKI'S)              | Subclinical hypothyroidism | Increased remission and overall survival                             | (159) |
|                        | Series/cohort               | 22 (sunitinib Tx)       | hypothyroidism             | Longer PFS                                                           | (161) |

|            |                            |                               |                                                  |                                                                               |       |
|------------|----------------------------|-------------------------------|--------------------------------------------------|-------------------------------------------------------------------------------|-------|
|            | Series/cohort              | 17 sunitinib tx               | Hypothyroidism (>50% reduction in thyroid gland) | Longer PFS                                                                    | (235) |
|            | Population based           | 57326                         | Hypothyroidism                                   | Increased risk in women                                                       | (233) |
| Esophageal | Case control               | 102 pts<br>160 controls       | hyperthyroidism                                  | Higher incidence of hyperthyroidism in cancer group                           | (236) |
| Pancreas   | Series/cohort              | 504                           | LT4 treatment                                    | Higher perineural invasion, T stage, nodal spread and poorer prognostic stage | (51)  |
|            | Case control               | 532 pts<br>1,701 controls     | hyperthyroidism                                  | Increased risk                                                                | (128) |
|            | Case report interventional | 1                             | Induced hypothyroxinemia                         | Tumor regression                                                              | (194) |
|            | Series/cohort              | 7338                          | Hyperthyroidism                                  | Increased mortality                                                           | (231) |
| Colorectal | Case control               | 2,566 pts<br>2,566 controls   | undetermined                                     | Eltroxin use associated with reduced risk of CRC                              | (191) |
|            | Case control               | 273 pts<br>819 controls       | Subclinical hypothyroidism                       | Higher subclinical hypothyroidism in CRC group                                | (139) |
|            | Prospective cohort         | 3,836                         | Full thyroid spectrum                            | Higher TSH associated with increased risk                                     | (130) |
|            | Cohort                     | 68                            | Free T3/free T4 ratio                            | Higher baseline ratio associated with increased survival                      | (164) |
|            | Case control               | 4729 pts<br>235925 controls   | LT4 treatment                                    | Reduction of rectal cancer risk associated with long term use of eltroxin     | (192) |
|            | Case control               | 20,990 pts<br>82,054 controls | Hyperthyroidism /hypothyroidism/ LT4 treatment   | Hyperthyroidism and untreated hypothyroidism associated with                  | (129) |

|                |                  |                                           |                                    |                                                                                                                                            |       |
|----------------|------------------|-------------------------------------------|------------------------------------|--------------------------------------------------------------------------------------------------------------------------------------------|-------|
|                |                  |                                           |                                    | increased risk and Long term thyroid hormone replacement associated with decreased risk of crc.                                            |       |
| Hepatocellular | Case control     | 420 pts<br>1104 controls                  | hypothyroidism                     | Increased risk in women                                                                                                                    | (131) |
|                | Series/cohort    | 123                                       | TSH x free t4                      | Higher value associated with favourable survival if chemotherapy provided and unfavourable if sorafenib administered.                      | (165) |
|                | Case control     | 54 cases<br>106 controls                  | hypothyroidism                     | Hypothyroidism more prevalent in HCC patients with unknown etiology                                                                        | (132) |
|                | Series/cohort    | 667                                       | Hypothyroidism/<br>Hyperthyroidism | High TSH associated with larger tumor and low TSH associated with smaller tumors. Elevated free T4 associated with lower overall survival. | (140) |
|                | Population based | 212,456                                   | Full thyroid spectrum              | Free T3 and free T4 inversely associated with cancer mortality                                                                             | (146) |
| Thyroid        | Population based | 57,326                                    | Hyperthyroidism                    | Increased risk                                                                                                                             | (233) |
|                | Case control     | 17,033 hyperthyroidism<br>34,066 controls | hyperthyroidism                    | Increased risk                                                                                                                             | (110) |
| Head and neck  | Series/cohort    | 155                                       | Hypothyroidism                     | Increased survival                                                                                                                         | (166) |
|                | Population based | 5,916                                     | Hypothyroidism                     | Increased survival                                                                                                                         | (167) |



|                          |                        |                                        |                                 |                                                                              |       |
|--------------------------|------------------------|----------------------------------------|---------------------------------|------------------------------------------------------------------------------|-------|
|                          | Prospective randomized | 300                                    | hypothyroidism                  | Increased survival                                                           | (169) |
| Melanoma                 | Series/cohort          | 91                                     | Hypothyroidism                  | No difference in survival                                                    | (237) |
| Multiple myeloma         | Case control           | 73 pts<br>73 controls                  | Full thyroid spectrum           | Free T3 higher and TSH lower in patients                                     | (134) |
| Acute leukemia           | Case control           | 25 pts<br>25 controls                  | Full thyroid spectrum           | Free T3, free T4, total T3, total T4 higher and TSH lower in cancer patients | (136) |
|                          | Series/cohort          | 870                                    | Hyperthyroidism /hypothyroidism | Improved outcome in Graves dis and Hashimoto                                 | (238) |
| Myelodysplastic syndrome | Case control           | 101 pts<br>101 control                 | Full thyroid spectrum           | Free T3 and free T4 higher and TSH lower in patients                         | (135) |
| Hematopoietic            | Population based       | 57,326                                 | Hypothyroidism                  | Increased risk in women                                                      | (233) |
| General                  | case control           | 2793 hyperthyroid<br>2793 controls     | Hypothyroidism                  | Hypothyroidism decreased cancer mortality followin RAI tx.                   | (241) |
|                          | Series/cohort          | 7338                                   | Hyperthyroidism                 | Increased cancer mortality                                                   | (231) |
|                          | Population based       | 3651                                   | Hyperthyroidism                 | No association with cancer mortality                                         | (239) |
|                          | Case control           | 3052 hyperthyroidism<br>12208 controls | Hyperthyroidism                 | TNG associated with increased cancer mortality                               | (141) |
|                          | Case series            | 23 end stage tumor patients            | Induced hypothyroxinemia        | Prolonged survival                                                           | (197) |

|  |                  |                                           |                                    |                                                                                        |       |
|--|------------------|-------------------------------------------|------------------------------------|----------------------------------------------------------------------------------------|-------|
|  | Population based | 115,746                                   | Subclinical hypothyroidism         | Higher cancer mortality (specifically bone, skin and breast)                           | (145) |
|  | Case control     | 2004 pts<br>10111 controls                | Subclinical hyperthyroidism        | No increased risk of cancer mortality                                                  | (240) |
|  | Population based | 212,456                                   | Full thyroid spectrum              | Free T3 inversely associated with cancer mortality                                     | (146) |
|  | Population based | 57,326                                    | Hypothyroidism                     | Increased risk of cancer 10 years after diagnosis                                      | (233) |
|  | Series/cohort    | 24                                        | hypothyroidism                     | High response rate to radiation therapy                                                | (243) |
|  | Series/cohort    | 538 (TKI tx)                              | Hypothyroidism/<br>LT4 treatment   | Hypothyroidism improved survival<br>In 5<TSH<10, hormone replacement improved survival | (242) |
|  | Case control     | 457 cases<br>373 controls                 | Hyperthyroidism<br>/Hypothyroidism | Hypothyroidism and hyperthyroidism more common in cancer patients                      | (179) |
|  | Population based | 29,691                                    | Hyperthyroidism                    | Increased cancer risk                                                                  | (109) |
|  | Population based | 10,318                                    | Hyperthyroidism                    | Free T4 associated with increased cancer risk                                          | (111) |
|  | Case control     | 17,033 hyperthyroidism<br>34,066 controls | Hyperthyroidism                    | Increased cancer risk                                                                  | (110) |
|  | Case control     | 9,520 pts<br>9,520 controls               | Hypothyroidism                     | Lower cancer mortality in hypothyroid patients                                         | (222) |
|  | Series/cohort    | 17                                        | Hypothyroidism                     | Higher rate of tumor regression                                                        | (138) |
